# Supplementary material for: The solid-state in situ construction of Cu2O/CuO heterostructures with adjustable phase compositions to promote CO oxidation activity
Source: Royal Society of Chemistry journal article supplement (doi:10.1039/d0ce01324b), 2020-01-01
Supplement: d0ce01324b1.pdf [file d0ce01324b1.pdf]

## Supporting information

### **Solid-state in situ constructing Cu<sub>2</sub>O/CuO heterostructures with adjustable phase compositions toward promoted CO oxidation activity**

Baolin Liu<sup>a</sup>, Yizhao Li<sup>a,b\*</sup>, Kun Wang<sup>a</sup>, Yali Cao<sup>a,\*</sup>

*<sup>a</sup>Key Laboratory of Energy Materials Chemistry, Ministry of Education, Key Laboratory of Advanced Functional Materials, Autonomous Region, Institute of Applied Chemistry, College of Chemistry, Xinjiang University, Urumqi 830046, Xinjiang, China.*

*<sup>b</sup>College of Chemical Engineering, Xinjiang University, Urumqi 830046, Xinjiang, China.*

*\*Corresponding author. Tel: +86-991-8583083; Fax: +86-991-8588883;*

*E-mails: liyizhao0809@126.com (Y. Li); caoyali523@163.com (Y. Cao).*

## 1. The characterization of catalyst

The structure information of samples was acquired by X-ray powder diffraction (XRD) on Bruker D8 employing Cu-K $\alpha$  radiation (1.54056 Å) equipped an operating voltage of 40 kV and a beam current of 40 mA. The morphologies of samples were observed by high resolution transmission electron microscope (HRTEM), which was obtained from a JEM-2010F electron microscope with an accelerating voltage of 200 kV. The surface components and structure of samples were characterized by X-ray photoelectron spectra (XPS) (Thermo Fisher Scientific ESCALAB250Xi) employing Al K $\alpha$  (1486.6 eV). Fourier transform infrared (FT-IR) spectra were obtained on a Bruker EQUINOX55 spectrophotometer in the wave interval between 4000 and 400 cm<sup>-1</sup>.

The reducibility of catalysts was investigated by H<sub>2</sub> temperature-programmed reduction (H<sub>2</sub>-TPR) (XQ 5870 series) measured in a quartz reactor. Typically, 50 mg of samples was pretreated in N<sub>2</sub> stream at 200°C for 30 min before testing, and then they were cooled to room temperature. The gas feed was switched to H<sub>2</sub>-N<sub>2</sub> stream where volume fraction of H<sub>2</sub> is 10%. The amount of H<sub>2</sub> consumption and the TPR profile was monitored by a thermal conductivity (TCD) detector and recorded with temperature programming at a rate of 10 °C min<sup>-1</sup> from room teperature to 500°C. The H<sub>2</sub> consumptions of the reduction band were calibrated by a standard CuO (99.998%) powder.

For O<sub>2</sub> temperature-programmed desorption (O<sub>2</sub>-TPD), about 100 mg of catalyst was pretreated in a He stream at 120°C for 1h with a flow rate of 30 mL/min. The temperature was reduced to 30°C and subsequently saturated with 10% O<sub>2</sub> (balanced with He) for 1h, then purged by pure He stream for 1h. Finally, the temperature was heated to 600°C at a rate of 10 °C min<sup>-1</sup>.

For CO temperature-programmed desorption (CO-TPD), about 100 mg of catalyst was pretreated in a He stream at 120°C for 1h with a flow rate of 30 mL/min. The temperature was reduced to 30°C and subsequently saturated with 10% CO (balanced with He) for 1h, then purged by pure He stream for 1h. Finally, the temperature was heated to 600°C at a rate of 10 °C min<sup>-1</sup>.

## 2. The test of catalytic performance

The activity and stability of catalysts toward to CO oxidation was evaluated in a fixed bed quartz reactor at atmospheric pressure. Typically, 100 mg of catalyst without any pretreatment was loaded. The mixed feed gas contained with 1 vol% CO and 20 vol% O<sub>2</sub> in N<sub>2</sub> balance at 50 ml min<sup>-1</sup> of flow rate (space velocity = 30000 ml gcat<sup>-1</sup> h<sup>-1</sup>) was applied to the reactor. The change of gas concentration was monitored with an online gas chromatography system (Agilent 7890B) equipped with a TCD detector. The CO conversion was calculated based on the following formula.

$$CO\ conversion\ (\%) = \frac{[CO]_{in} - [CO]_{out}}{[CO]_{in}} \times 100\% \quad (1)$$

The reaction rate ( $R_{CO}$  (mol g<sup>-1</sup> s<sup>-1</sup>) for CO oxidation at certain temperature were calculated by the following the equation:

$$R_{CO} = \frac{X_{CO}V_{CO}}{m} \quad (2)$$

where  $X_{CO}$  is the CO conversion,  $V_{CO}$  the CO gas flow rate (in units of mol s<sup>-1</sup>), and  $m$  is the mass of catalyst (in grams).

The apparent activation energies ( $E_a$ ) are calculated by the Arrhenius Equation:  $\ln k = -E_a/RT + \ln A$ , when CO conversion lower than 15%, where  $k$  stands for the reaction rate constant,  $R=8.314\text{ J}\cdot\text{mol}^{-1}\cdot\text{K}^{-1}$ ,  $T$  for the reaction temperature,  $A$  for the Arrhenius factor.

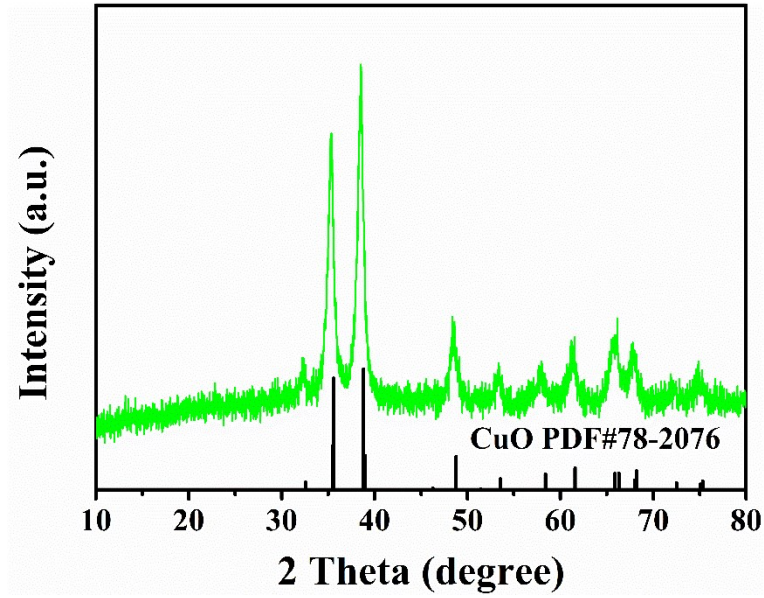

Fig. S1. The powder XRD pattern of CuO catalysts.

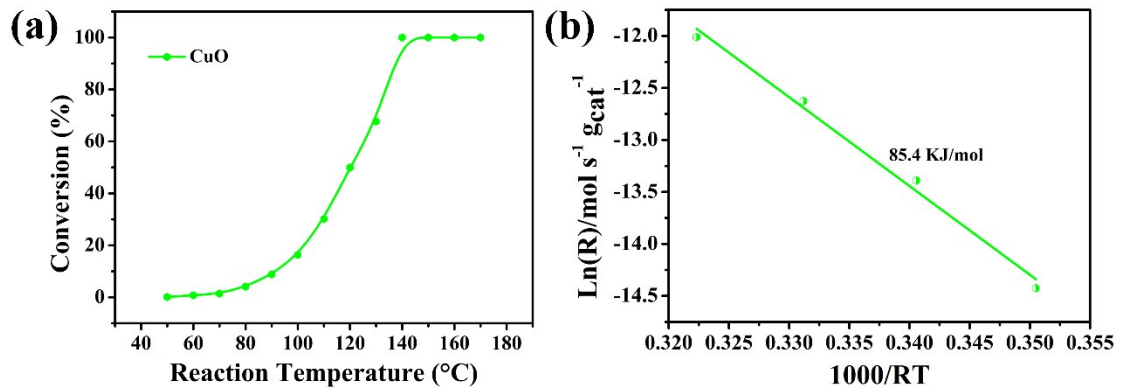

Fig. S2. (a) Light-off curve of CO oxidation; (b) Arrhenius plot and apparent activation energy of CuO catalyst.

**Table S1** Quantified differential CO conversion rates of the catalysts at 120°C.

| Sample                    | R at 120°C (mol s <sup>-1</sup> g <sup>-1</sup> ) (×10 <sup>-5</sup> ) <sup>a</sup> |
|---------------------------|-------------------------------------------------------------------------------------|
| Cu <sub>2</sub> O/CuO-0.5 | 3.27                                                                                |
| Cu <sub>2</sub> O/CuO-1   | 7.39                                                                                |
| Cu <sub>2</sub> O/CuO-5   | 30.17                                                                               |
| Cu <sub>2</sub> O/CuO-7   | 17.16                                                                               |

<sup>a</sup>R: CO conversion rates normalized by catalyst weights.

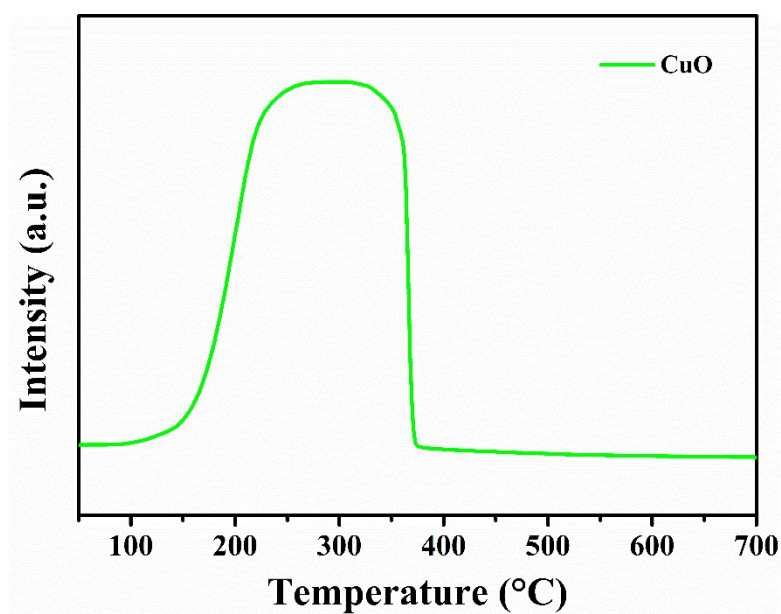

**Fig. S3.** H<sub>2</sub>-TPR result of CuO sample.

**Table S2** Catalytic activity of CO oxidation with Cu<sub>2</sub>O/CuO heterostructures obtained from different preparation method reported in previous literature.

| Sample                                    | method                              | Amount of catalyst (mg)  | Feed gas composition                                                 | Flow rate (mL·min <sup>-1</sup> ) | T <sub>50</sub> (°C) | T <sub>100</sub> (°C) | Ref.         |
|-------------------------------------------|-------------------------------------|--------------------------|----------------------------------------------------------------------|-----------------------------------|----------------------|-----------------------|--------------|
| CuO/RGO                                   | Hydrotherma<br>l method             | 400                      | CO/O <sub>2</sub> /N <sub>2</sub> =10/21/83                          | 73.2                              | 130                  | 165                   | 1            |
| CuO nanowires                             | Heating Cu<br>grids in air          | 36                       | CO/O <sub>2</sub> /N <sub>2</sub> =1/16/83                           | 100                               | 300                  | 360                   | 2            |
| CuO<br>nanoparticles                      | precipitation<br>method             | 50                       | CO/O <sub>2</sub> /He = 4/20/76                                      | 60                                | 100                  | 125                   | 3            |
| Cu <sub>2</sub> O                         | Solution-<br>phase<br>methods       | 30+30(SiO <sub>2</sub> ) | CO/O <sub>2</sub> /N <sub>2</sub> =1/20/79                           | 30                                | -                    | 240                   | 4            |
| Cubic Au-<br>CuO/Cu <sub>2</sub> O        | chemical<br>precipitation<br>method | 200                      | CO/O <sub>2</sub> /H <sub>2</sub> /N <sub>2</sub> =<br>1.2/0.8/50/48 | 50                                | 150                  | 200                   | 5            |
| CuO/Cu <sub>2</sub> O<br>composites       | Solution<br>method                  | 60                       | CO/O <sub>2</sub> /He = 1/6/93                                       | 135                               | 175                  | 225                   | 6            |
| CuO<br>nanopowders                        | Precipitation                       | -                        | CO/O <sub>2</sub> /Ne/He=0.2/1/0.<br>2/98.6                          | 1000                              | 108                  | 150                   | 7            |
| Cu-Cu <sub>2</sub> O<br>Heterogeneous     | Solution<br>method                  | 100                      | CO/O <sub>2</sub> /N <sub>2</sub> = 1/10/89                          | 100                               | 178                  | 228                   | 8            |
| CuO/Cu <sub>2</sub> O<br>composites       | Hydrotherma<br>l method             | 50                       | CO/O <sub>2</sub> /He = 1/20/79                                      | 30                                | 110                  | 140                   | 9            |
| Cu <sub>2</sub> O-CuO<br>nanospheres      | Solution<br>method                  | 100                      | CO/O <sub>2</sub> /N <sub>2</sub> = 1/3/96                           | 40                                | 117                  | 140                   | 10           |
| Cu <sub>2</sub> O/CuO<br>heterostructures | Solid-state<br>chemical<br>method   | 100                      | CO/O <sub>2</sub> /N <sub>2</sub> = 1/20/79                          | 50                                | 108                  | 130                   | This<br>work |

## References

1. Y. Wang, Z. H. Wen, H. L. Zhang, G. H. Cao, Q. Sun and J. L. Cao, *Catalysts*, 2016, **6**, 1-8.
2. H. Yan, X. Liu, R. Xu, P. Lv and P. Zhao, *Mater. Res. Bull.*, 2013, **48**, 2102-2105.
3. A. F. Zedan, A. T. Mohamed, M. S. El-Shall, S. Y. AlQaradawi and A. S. AlJaber, *RSC Advances*, 2018, **8**, 19499-19511.
4. H. Bao, W. Zhang, Q. Hua, Z. Jiang, J. Yang and W. Huang, *Angew. Chem. Int. Ed. Engl.*, 2011, **50**, 12294-12298.
5. C. X. Qi, Y. H. Zheng, H. Lin, H. J. Su, X. Sun and L. B. Sun, *Appl. Catal. B Environ.*, 2019, **253**, 160-169.
6. S. Zhang, H. Liu, C. Sun, P. Liu, L. Li, Z. Yang, X. Feng, F. Huo and X. Lu, *J. Mater. Chem. A*, 2015, **3**, 5294-5298.
7. D. A. Svintsitskiy, T. Y. Kardash, O. A. Stonkus, E. M. Slavinskaya, A. I. Stadnichenko, S. V. Koscheev, A. P. Chupakhin and A. I. Boronin, *J. Phys. Chem. C*, 2013, **117**, 14588-14599.
8. B. Ma, C. C. Kong, J. Lv, X. J. Zhang, S. Yang, T. Yang and Z. M. Yang, *Adv. Mater. Interfaces*, 2020, **7**, 1901643.
9. Y. Yang, H. Dong, Y. Wang, Y. Wang, N. Liu, D. Wang and X. Zhang, *Inorg. Chem. Commun.*, 2017, **86**, 74-77.
10. B. Wei, N. Yang, F. Pang and J. Ge, *The Journal of Physical Chemistry C*, 2018, **122**, 19524-19531.
